# Supplementary material for: Two novel Pd thiosemicarbazone complexes as efficient and selective antitumoral drugs
Source: Royal Society of Chemistry journal article supplement (doi:10.1039/d2qi02424a), 2022-12-29
Supplement: d2qi02424a1.pdf [file d2qi02424a1.pdf]

## Supporting information

### Two novel Pd thiosemicarbazone complexes as efficient and selective antitumoral drugs

Tania Hidalgo,<sup>a</sup> David Fabra,<sup>b</sup> Raul Allende,<sup>b†</sup> Ana I Matesanz,<sup>b</sup> Patricia Horcajada,<sup>\*a</sup> Tarita Biver,<sup>\*c</sup> Adoracion G.Quiroga.<sup>\*b</sup>

#### Table of contents

|                                                                                                                                                                                                                                                                                                                                                                                                                                                    |    |
|----------------------------------------------------------------------------------------------------------------------------------------------------------------------------------------------------------------------------------------------------------------------------------------------------------------------------------------------------------------------------------------------------------------------------------------------------|----|
| <b>Figure S1.</b> 2D [ <sup>1</sup> H, <sup>13</sup> C] HMBC NMR spectra for complex [Pd(L) <sub>2</sub> ] .....                                                                                                                                                                                                                                                                                                                                   | 2  |
| <b>Figure S2.</b> Aliphatic area of the 2D [ <sup>1</sup> H, <sup>13</sup> C] HMBC NMR spectra of complex [PdLCl(DMSO)] .....                                                                                                                                                                                                                                                                                                                      | 2  |
| <b>Figure S3.</b> Aromatic area of the spectra (A) HMQC and (B) HMBC for complex [PdLCl(DMSO)] .....                                                                                                                                                                                                                                                                                                                                               | 3  |
| <b>Table S1.</b> Selected bond distances (Å) and angles (°) for complex [PdLCl(DMSO)]. .....                                                                                                                                                                                                                                                                                                                                                       | 3  |
| <b>Figure S4.</b> (A) UV-Vis spectra of the complexes [Pd(L) <sub>2</sub> ] (2.50×10 <sup>-3</sup> M, 3% DMSO) and [PdLCl(DMSO)] (2.50×10 <sup>-3</sup> M, 5% DMSO) in Tris HCl solution, recorded at different times. (B) UV-Vis spectra of the complexes [Pd(L) <sub>2</sub> ] (2.50×10 <sup>-3</sup> M, 3% DMSO) and [PdLCl(DMSO)] (2.50×10 <sup>-3</sup> M, 5% DMSO) in Tris-HCl solution with 4 μM of NaCl, recorded at different times. .... | 4  |
| <b>Figure S5.</b> Spectroscopic characterization of [Pd(L) <sub>2</sub> ] and [PdLCl(DMSO)] complexes in Tris-HCl 5 mM, NaCl 100 mM, pH 7.4 at 25 °C .....                                                                                                                                                                                                                                                                                         | 4  |
| <b>Figure S6.</b> (A), (C) Stability of [Pd(L) <sub>2</sub> ] as a function of the temperature (from 25 to 95 °C) and (B), (D) Stability of [PdLCl(DMSO)] with temperature .....                                                                                                                                                                                                                                                                   | 5  |
| <b>Table S2.</b> IC <sub>50</sub> and selective index values of [Pd(L) <sub>2</sub> ], [PdLCl(DMSO)] and cisplatin after 72h of incubation with HL-60, Caco-2 and PC-3 cells .....                                                                                                                                                                                                                                                                 | 5  |
| <b>Table S3.</b> Effect of [Pd(L) <sub>2</sub> ] and [PdLCl(DMSO)] complexes in the cell cycle distribution of Caco-2 and PC-3 cell line after 72h of treatment .....                                                                                                                                                                                                                                                                              | 6  |
| <b>Figure S7.</b> Subcellular distribution of [Pd(L) <sub>2</sub> ], [PdLCl(DMSO)] and their respective precursors in A) Caco-2 and B) PC-3 cells after 72 h of incubation with 5 μM of each complex .....                                                                                                                                                                                                                                         | 6  |
| <b>Figure S8.</b> Spectrophotometric titrations of the complexes with biosubstrates.....                                                                                                                                                                                                                                                                                                                                                           | 7  |
| <b>Table S4.</b> DNA/BSA binding constants (K <sub>b</sub> ) values for different Pd(II)-thiosemicarbazone complexes. DNA is always natural DNA from calf thymus.....                                                                                                                                                                                                                                                                              | 8  |
| <b>Figure S9.</b> Binding isotherms of fluorescence exchange reaction of (A) EtBr-saturated DNA with [Pd(L) <sub>2</sub> ] and [PdLCl(DMSO)] and (B) Et-Br-saturated RNA (poly(rA)-poly(rU)) with [Pd(L) <sub>2</sub> ] and [PdLCl(DMSO)] .....                                                                                                                                                                                                    | 9  |
| <b>Table S5.</b> Crystal data and structure refinement results for compound [PdLCl(DMSO)]. .....                                                                                                                                                                                                                                                                                                                                                   | 10 |

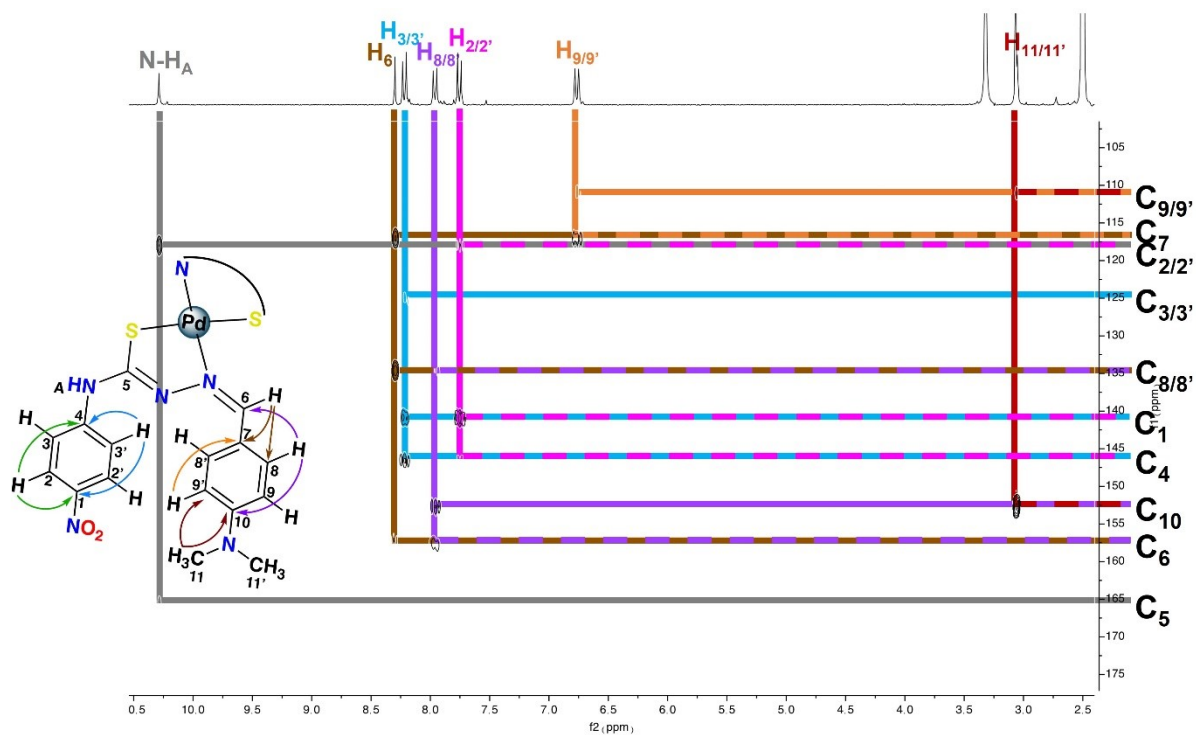

**Figure S1.** 2D  $^1\text{H}$ ,  $^{13}\text{C}$  HMBC NMR spectra for complex  $[\text{Pd}(\text{L})_2]$ .

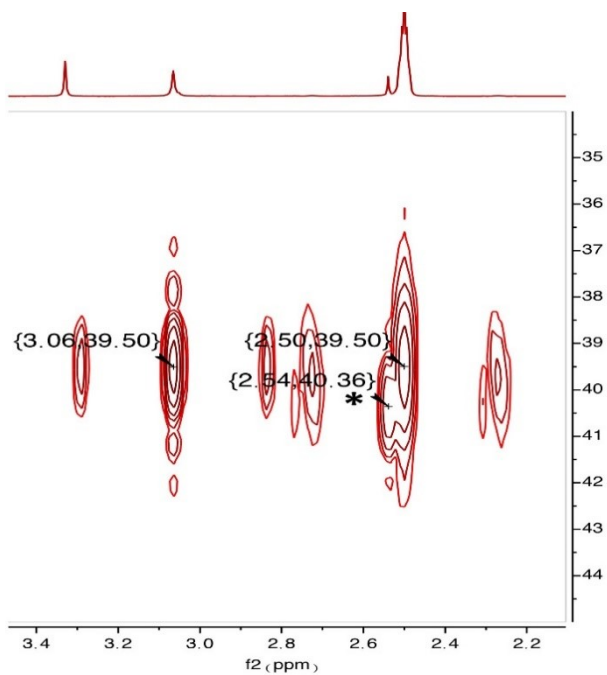

**Figure S2.** Aliphatic area of the 2D  $^1\text{H}$ ,  $^{13}\text{C}$  HMBC NMR spectra of complex  $[\text{PdCl}(\text{DMSO})]$ . The new DMSO methyl group signal is indicated with an asterisk (\*).

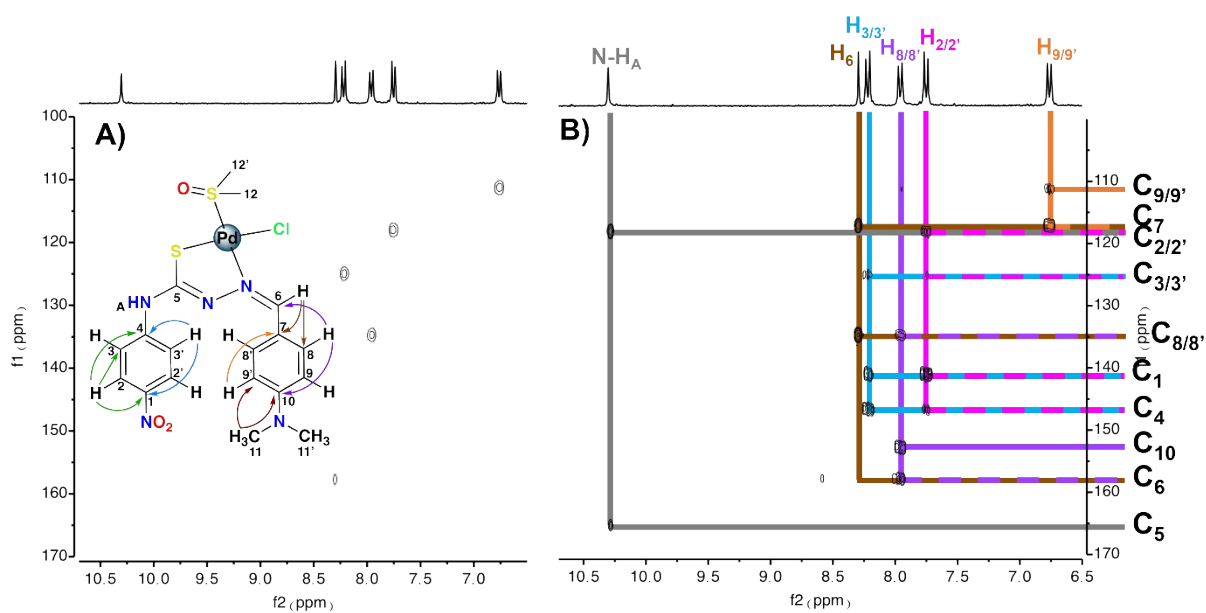

**Figure S3.** Aromatic area of the spectra (A) HMQC and (B) HMBC for complex [PdLCl(DMSO)].

**Table S1.** Selected bond distances (Å) and angles (°) for complex [PdLCl(DMSO)].

| Bond lengths (Å)                 |           | Angles (°)                                       |            |
|----------------------------------|-----------|--------------------------------------------------|------------|
| C <sub>1</sub> –N <sub>2</sub>   | 1.288(9)  | N <sub>1</sub> –Pd <sub>1</sub> –S <sub>1</sub>  | 83.37(19)  |
| C <sub>1</sub> –N <sub>3</sub>   | 1.388(10) | N <sub>1</sub> –Pd <sub>1</sub> –S <sub>2</sub>  | 171.77(19) |
| C <sub>1</sub> –S <sub>1</sub>   | 1.752(7)  | N <sub>1</sub> –Pd <sub>1</sub> –Cl <sub>1</sub> | 96.67(19)  |
| C <sub>8</sub> –N <sub>1</sub>   | 1.297(9)  | S <sub>1</sub> –Pd <sub>1</sub> –Cl <sub>1</sub> | 177.03(9)  |
| N <sub>1</sub> –N <sub>2</sub>   | 1.388(9)  | S <sub>2</sub> –Pd <sub>1</sub> –Cl <sub>1</sub> | 89.71(8)   |
| Pd <sub>1</sub> –Cl <sub>1</sub> | 2.350(2)  | *S <sub>1</sub> –Pd <sub>1</sub> –S <sub>2</sub> | 90.53(8)   |
| Pd <sub>1</sub> –N <sub>1</sub>  | 2.075(6)  | N <sub>6</sub> –Pd <sub>2</sub> –S <sub>3</sub>  | 84.15(19)  |
| Pd <sub>1</sub> –S <sub>1</sub>  | 2.234(2)  | N <sub>6</sub> –Pd <sub>2</sub> –S <sub>4</sub>  | 173.28(18) |
| Pd <sub>1</sub> –S <sub>2</sub>  | 2.249(2)  | N <sub>6</sub> –Pd <sub>2</sub> –Cl <sub>2</sub> | 96.29(19)  |
|                                  |           | S <sub>3</sub> –Pd <sub>2</sub> –Cl <sub>2</sub> | 179.12(10) |
|                                  |           | S <sub>4</sub> –Pd <sub>2</sub> –Cl <sub>2</sub> | 89.61(8)   |
|                                  |           | S <sub>3</sub> –Pd <sub>2</sub> –S <sub>4</sub>  | 89.99(7)   |

\*As it can be found in the CIF file, the structure shows the presence of two symmetry-independent molecules which do not differ significantly from each other

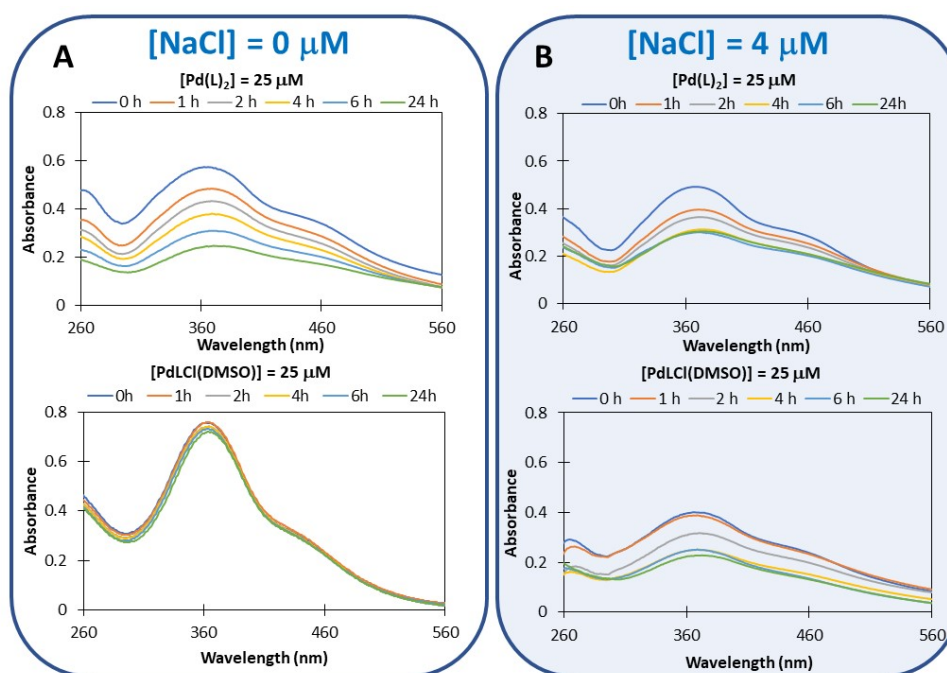

**Figure S4.** (A) UV-Vis spectra of the complexes  $[\text{Pd}(\text{L})_2]$  ( $2.50 \times 10^{-5}$  M, 3% DMSO) and  $[\text{PdLCl}(\text{DMSO})]$  ( $2.50 \times 10^{-5}$  M, 5% DMSO) in Tris HCl solution, recorded at different times. (B) UV-Vis spectra of the complexes  $[\text{Pd}(\text{L})_2]$  ( $2.50 \times 10^{-5}$  M, 3% DMSO) and  $[\text{PdLCl}(\text{DMSO})]$  ( $2.50 \times 10^{-5}$  M, 5% DMSO) in Tris-HCl solution with 4  $\mu\text{M}$  of NaCl, recorded at different times.

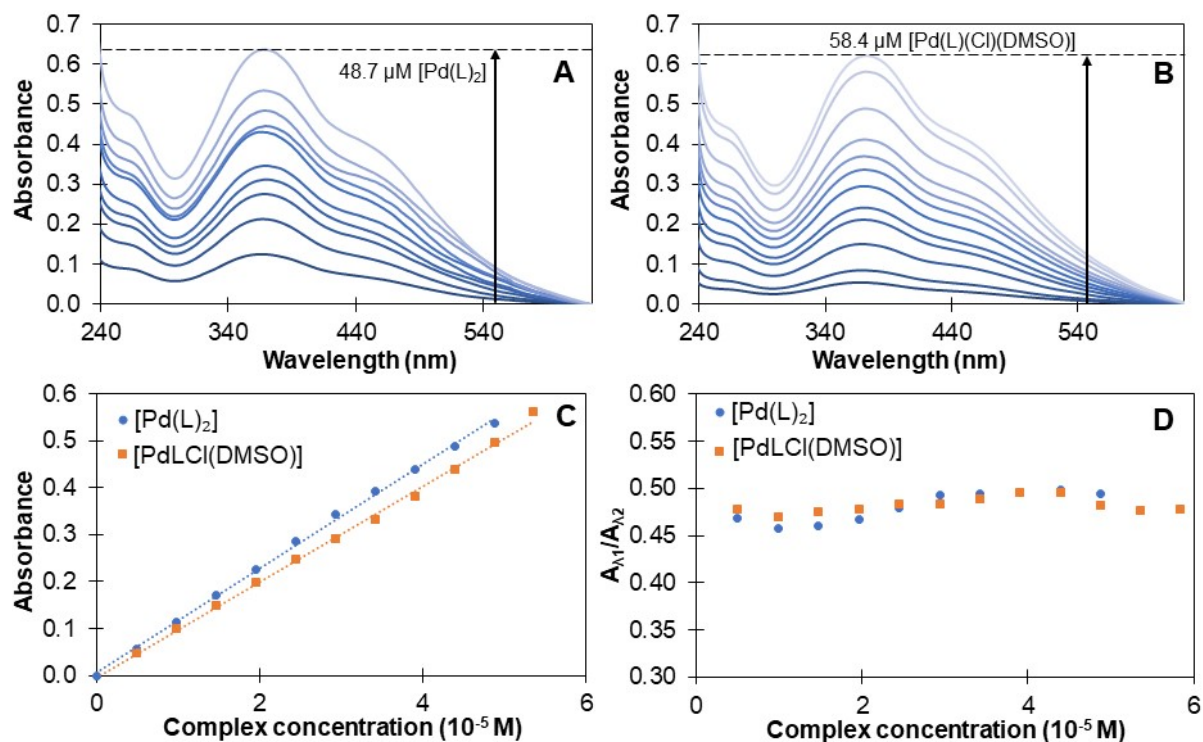

**Figure S5.** Spectroscopic characterization of  $[\text{Pd}(\text{L})_2]$  and  $[\text{PdLCl}(\text{DMSO})]$  complexes in Tris-HCl 5 mM, NaCl 100 mM, pH 7.4 at 25 °C. (A)  $[\text{Pd}(\text{L})_2]$  from  $4.92 \times 10^{-6}$  to  $4.87 \times 10^{-5}$  M; (B)  $[\text{PdLCl}(\text{DMSO})]$  from  $4.92 \times 10^{-6}$  to  $5.84 \times 10^{-5}$  M; (C) Lambert-Beer plots at 371 nm of  $[\text{Pd}(\text{L})_2]$  ( $\epsilon = 1.11 \times 10^4 \text{ M}^{-1} \text{ cm}^{-1}$ , blue dot) and  $[\text{PdLCl}(\text{DMSO})]$  ( $\epsilon = 1.05 \times 10^4 \text{ M}^{-1} \text{ cm}^{-1}$ , orange square); (D) Absorbance ratio plots of  $[\text{Pd}(\text{L})_2]$  ( $A_{299}/A_{371}$ , blue dot) and  $[\text{PdLCl}(\text{DMSO})]$  ( $A_{300}/A_{371}$ , orange square).

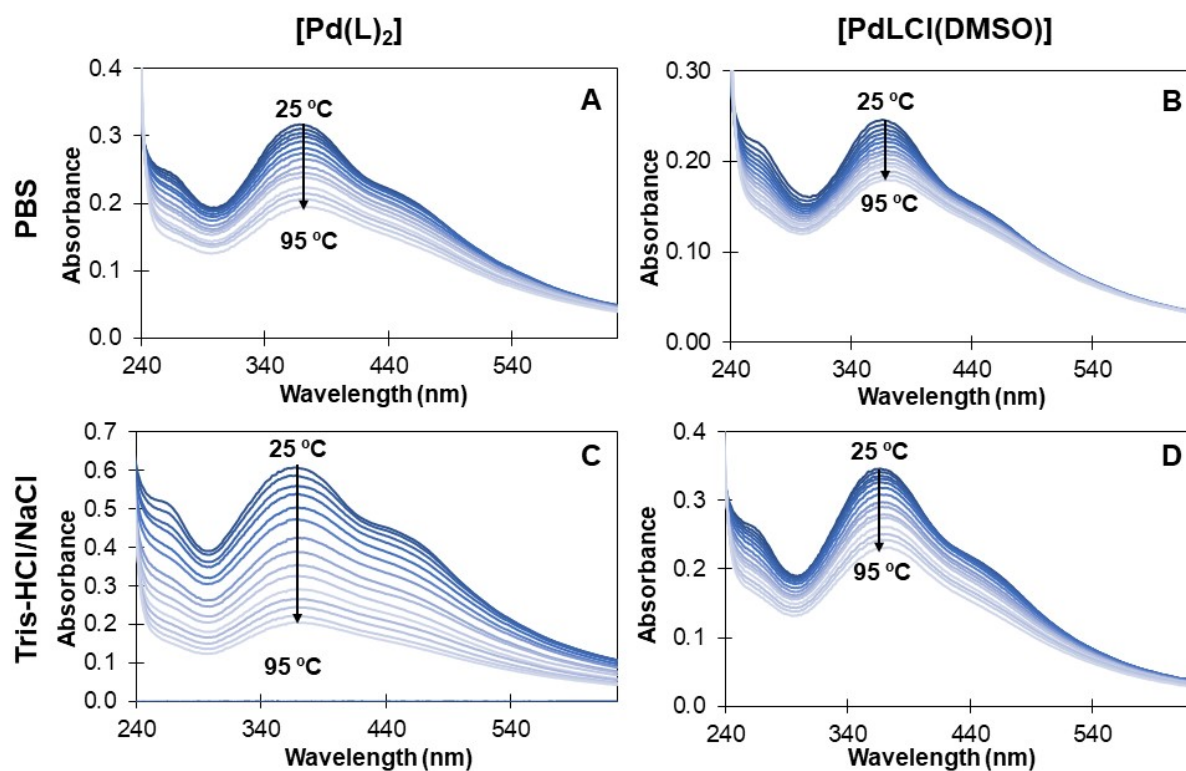

**Figure S6.** (A), (C) Stability of  $[Pd(L)_2]$  as a function of the temperature (from 25 to 95 °C) in (A) PBS (phosphate 50 mM, NaCl 150 mM, pH 7.2), and (C) Tris-HCl 5 mM/NaCl 100 mM (pH 7.4) buffers; (B), (D) Stability of  $[PdLCl(DMSO)]$  with temperature in (B) PBS and (D) Tris-HCl/NaCl buffers (arrows: temperature increase from 25 to 95 °C).  $C_{complex} = 3.57 \times 10^{-5}$  M.

**Table S2.**  $IC_{50}$  and selective index values of  $[Pd(L)_2]$ ,  $[PdLCl(DMSO)]$  and cisplatin after 72h of incubation with HL-60, Caco-2 and PC-3 cells.

| Complex         | $IC_{50}$ ( $\mu M$ ) |                 |                 | Selective Index |      |
|-----------------|-----------------------|-----------------|-----------------|-----------------|------|
|                 | HL-60                 | Caco-2          | PC-3            | Caco-2          | PC-3 |
| $[Pd(L)_2]$     | > 10 (*OOR)           | $2.10 \pm 0.03$ | $1.25 \pm 0.13$ | 0.16            | 0.09 |
| $[PdLCl(DMSO)]$ | > 10 (*OOR)           | $2.40 \pm 0.06$ | $1.22 \pm 0.09$ | 0.22            | 0.11 |
| Cisplatin       | $0.62 \pm 0.05$       | $0.16 \pm 0.00$ | <0.08 (*OOR)    | 0.26            | 0.13 |

\*OOR: Out of Range)

**Table S3.** Effect of [Pd(L)<sub>2</sub>] and [PdLCl(DMSO)] complexes in the cell cycle distribution of Caco-2 and PC-3 cell line after 72h of treatment. Controls are depicted as negative cells (C-: exposed to no treatment) and cisplatin, as reference compound. Cell cycle checkpoint activation was evaluated by flow cytometry (FACs Melody). Data shown as mean ± S.D of two assays in triplicates.

| Cell line | Phase | C-         | [Pd(L) <sub>2</sub> ] | [PdLCl(DMSO)] | Cisplatin   |
|-----------|-------|------------|-----------------------|---------------|-------------|
| PC-3      | G0/G1 | 11.1 ± 2.0 | 2.2 ± 0.3             | 13.1 ± 4.2    | 0.0 ± 0.0   |
|           | S     | 56.3 ± 3.0 | 94.5 ± 4.0            | 99.3 ± 1.0    | 100.0 ± 0.0 |
|           | G2/M  | 37.6 ± 5.5 | 0.5 ± 0.1             | 0.1 ± 0.0     | 0.18 ± 0.1  |
| Caco-2    | G0/G1 | 0.9 ± 0.1  | 5.4 ± 0.9             | 6.6 ± 0.5     | 6.5 ± 1.3   |
|           | S     | 99.0 ± 4.7 | 89.0 ± 2.3            | 81.2 ± 6.2    | 77.0 ± 3.5  |
|           | G2/M  | 2.8 ± 0.3  | 3.1 ± 0.1             | 0.1 ± 0.0     | 0.1 ± 0.0   |

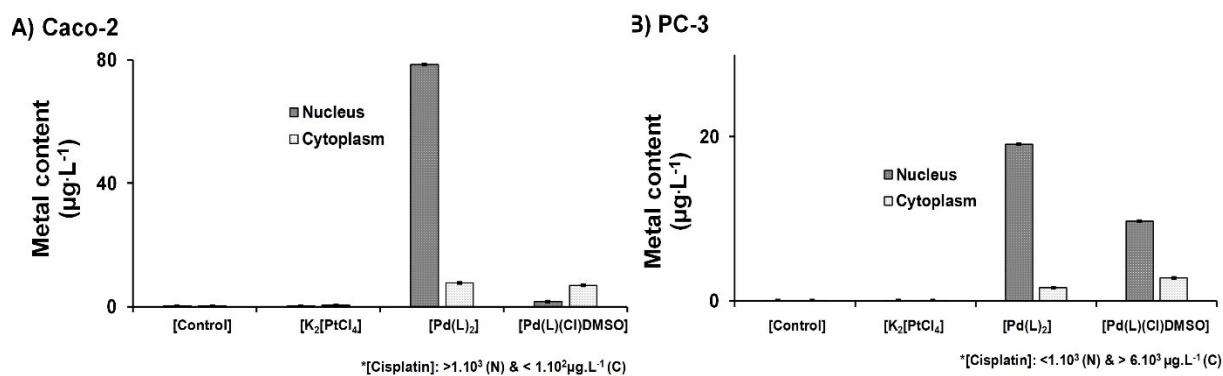

**Figure S7.** Subcellular distribution of [Pd(L)<sub>2</sub>], [PdLCl(DMSO)] and their respective precursors in A) Caco-2 and B) PC-3 cells after 72 h of incubation with 5 µM of each complex. Data are expressed as the metal content (µg·L<sup>-1</sup>) in the nucleus (N) or cytoplasm (C).

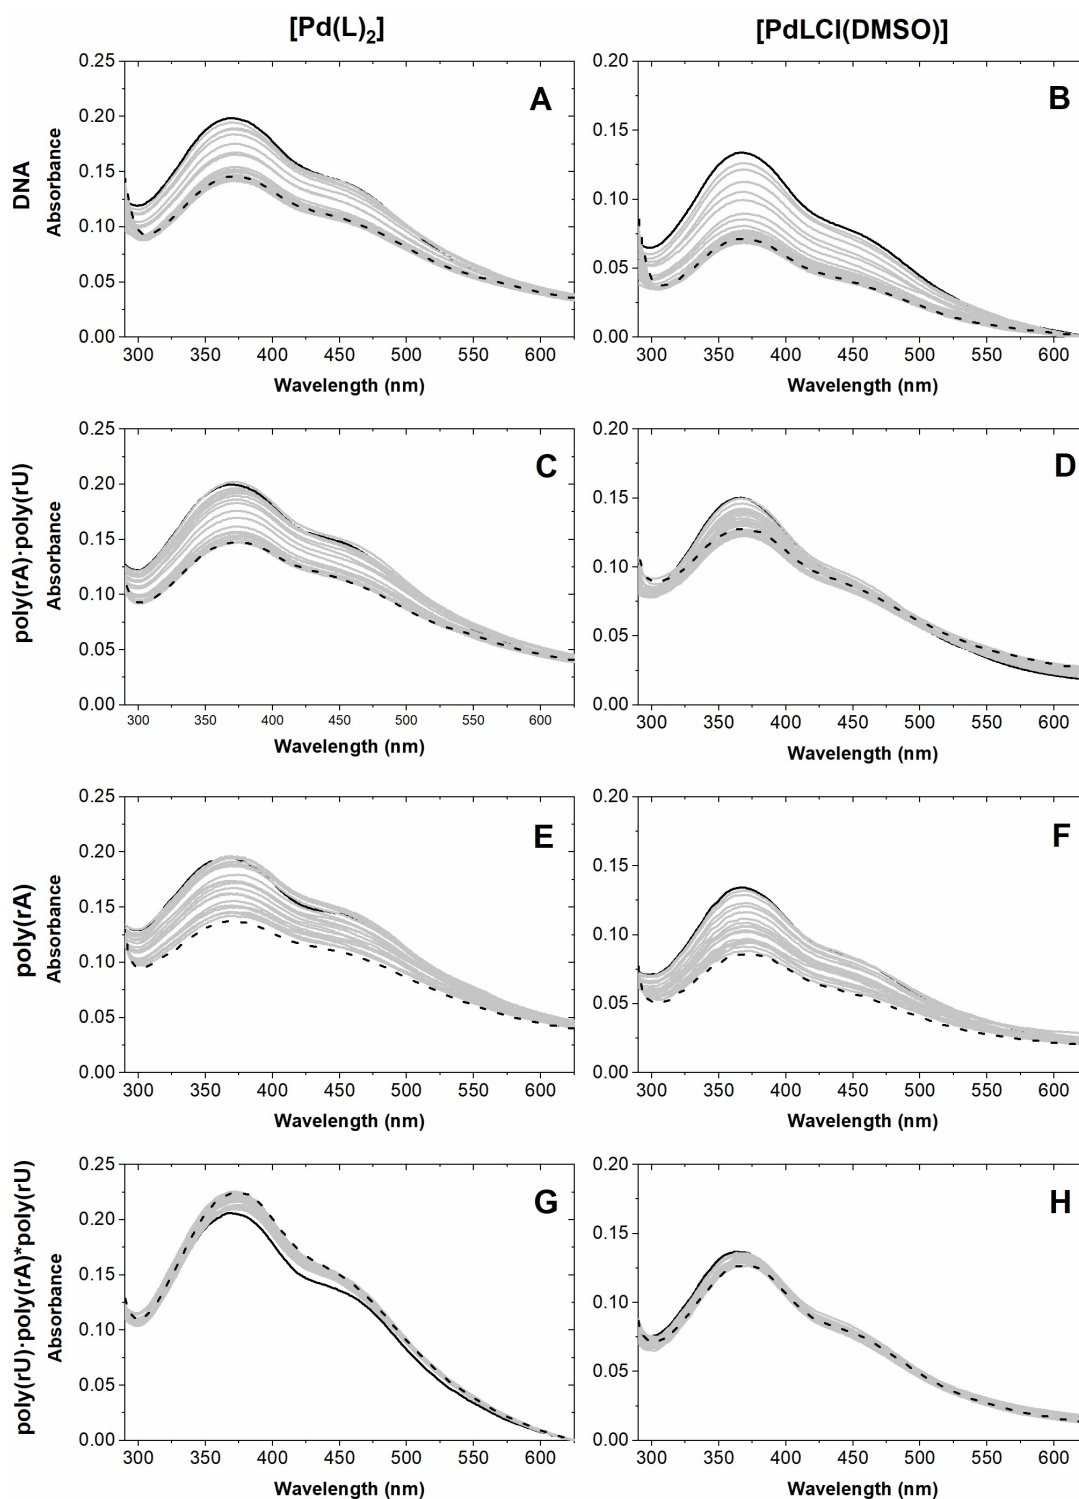

**Figure S8.** Spectrophotometric titrations of (A)  $[\text{Pd}(\text{L})_2]/\text{DNA}$  ( $C_{\text{complex}} = 1.06 \times 10^{-5} \text{ M}$ ,  $C_{\text{DNA}}$  from 0 (solid) to  $1.67 \times 10^{-5} \text{ M}$  (dashed)); (B)  $[\text{PdLCl}(\text{DMSO})]/\text{DNA}$  ( $C_{\text{complex}} = 1.06 \times 10^{-5} \text{ M}$ ,  $C_{\text{DNA}}$  from 0 (solid) to  $1.69 \times 10^{-5} \text{ M}$  (dashed)); (C)  $[\text{Pd}(\text{L})_2]/\text{poly}(\text{rA}) \cdot \text{poly}(\text{rU})$  ( $C_{\text{complex}} = 1.06 \times 10^{-5} \text{ M}$ ,  $C_{\text{poly}(\text{rA}) \cdot \text{poly}(\text{rU})}$  from 0 (solid) to  $8.10 \times 10^{-6} \text{ M}$  (dashed)); (D)  $[\text{PdLCl}(\text{DMSO})]/\text{poly}(\text{rA}) \cdot \text{poly}(\text{rU})$  ( $C_{\text{complex}} = 1.06 \times 10^{-5} \text{ M}$ ,  $C_{\text{poly}(\text{rA}) \cdot \text{poly}(\text{rU})}$  from 0 (solid) to  $8.10 \times 10^{-6} \text{ M}$  (dashed)); (E)  $[\text{Pd}(\text{L})_2]/\text{poly}(\text{rA})$  ( $C_{\text{complex}} = 1.06 \times 10^{-5} \text{ M}$ ,  $C_{\text{poly}(\text{rA})}$  from 0 (solid) to  $3.32 \times 10^{-5} \text{ M}$  (dashed)); (F)  $[\text{PdLCl}(\text{DMSO})]/\text{poly}(\text{rA})$  ( $C_{\text{complex}} = 1.06 \times 10^{-5} \text{ M}$ ,  $C_{\text{poly}(\text{rA})}$  from 0 (solid) to  $2.70 \times 10^{-5} \text{ M}$  (dashed)); (G)  $[\text{Pd}(\text{L})_2]/\text{poly}(\text{rU}) \cdot \text{poly}(\text{rA}) \cdot \text{poly}(\text{rU})$  ( $C_{\text{complex}} = 1.06 \times 10^{-5} \text{ M}$ ,  $C_{\text{poly}(\text{rU}) \cdot \text{poly}(\text{rA}) \cdot \text{poly}(\text{rU})}$  from 0 (solid) to  $5.41 \times 10^{-6} \text{ M}$  (dashed)); and (H)  $[\text{PdLCl}(\text{DMSO})]/\text{poly}(\text{rU}) \cdot \text{poly}(\text{rA}) \cdot \text{poly}(\text{rU})$  ( $C_{\text{complex}} = 1.06 \times 10^{-5} \text{ M}$ ,  $C_{\text{poly}(\text{rU}) \cdot \text{poly}(\text{rA}) \cdot \text{poly}(\text{rU})}$  from 0 (solid) to  $5.41 \times 10^{-6} \text{ M}$  (dashed)); Tris-HCl 5 mM, NaCl 100 mM, pH 7.4, 25 °C.

**Table S4.** DNA/BSA binding constants ( $K_b$ ) values for different Pd(II)-thiosemicarbazone complexes. DNA is always natural DNA from calf thymus. The Log $K$  ranges are related to the fact that the reference considers a series of derivatives of the same Pd(II) complex.

| DNA BUFFER                       | pH  | T (°C) | DNA conc* | DNA<br>Log $K_b$ | BSA<br>Log $K_b$ | REF/DOI                         |
|----------------------------------|-----|--------|-----------|------------------|------------------|---------------------------------|
| Tris-HCl (5 mM)<br>NaCl (100 Mm) | 7.4 | 25     | bp        | 6.0 – 6.1        | 6.5 – 7.2        | This work                       |
| Tris-HCl (5 mM),<br>NaCl (50 mM) | 7.4 | 37     | bp        | 4.6 – 6.2        |                  | 10.1016/j.jinorgbio.2019.110875 |
| Tris-HCl (5 mM)<br>NaCl (50 mM)  | 7.2 | RT     | P         | 4.4 – 5.2        |                  | 10.1016/j.ica.2021.120440       |
| Tris-HCl (5 mM)<br>NaCl (50 Mm)  | 7.2 | RT     | P         | 5.0 – 5.7        | 4.5 – 6.8        | 10.1021/acs.inorgchem.0c02373   |
| Tris-HCl (5 mM)<br>NaCl (50 Mm)  | 7.2 | RT     | P         | 4.5 – 5.7        | 4.1 – 4.5        | 10.1016/j.molstruc.2020.127703  |
| Tris-HCl (5 mM)<br>NaCl (50 Mm)  | 7.2 | RT     | P         | 4.8 – 6.3        |                  | 10.1002/aoc.3813                |
| Tris-HCl (5 mM)<br>NaCl (50 mM)  | 7.2 | RT     | P         | 4.8              |                  | 10.1016/j.jinorgbio.2014.04.017 |
| Tris-HCl (5 mM)<br>NaCl (50 Mm)  | 7.2 | rRT    | P         | 3.8 – 4.4        | 5.8 – 6.0        | 10.1021/ic302258k               |

\*DNA conc = way DNA concentration is expressed for  $K_b$  calculations, bp meaning in base pairs units while P is phosphates units. The difference between bp and P is supposed to produce no more than 0.3 increase in Log $K_b$  estimation in P.



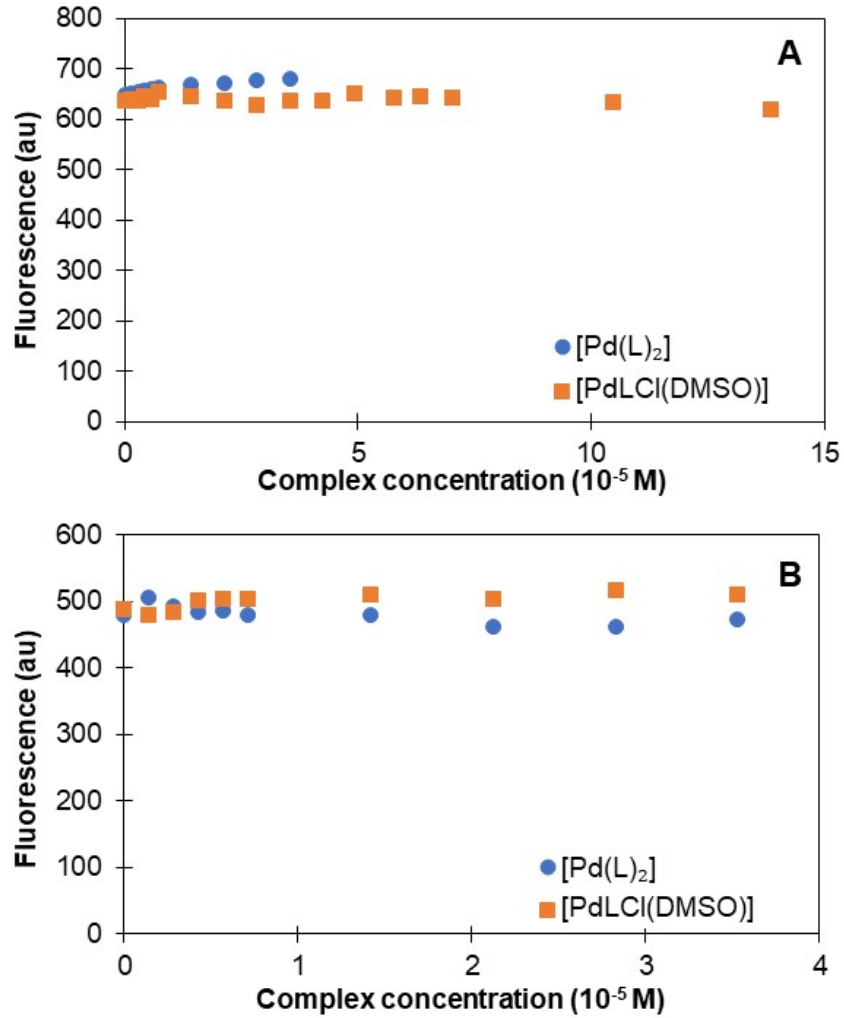

**Figure S9.** Binding isotherms of fluorescence exchange reaction of (A) EtBr-saturated DNA with  $[Pd(L)_2]$  ( $C_{EtBr} = 9.16 \times 10^{-5}$  M,  $C_{DNA} = 2.40 \times 10^{-4}$  M,  $C_{complex}$  from 0 to  $3.94 \times 10^{-4}$  M) and  $[PdLCl(DMSO)]$  ( $C_{EtBr} = 9.16 \times 10^{-5}$  M,  $C_{DNA} = 2.40 \times 10^{-4}$  M,  $C_{complex}$  from 0 to  $5.68 \times 10^{-4}$  M), Tris-HCl 5 mM, NaCl 100 mM, pH 7.4, 25 °C,  $\lambda_{exc} = 510$  nm,  $\lambda_{em} = 595$  nm; (B) Et-Br-saturated RNA (poly(rA)·poly(rU)) with  $[Pd(L)_2]$  ( $C_{EtBr} = 7.83 \times 10^{-5}$  M,  $C_{RNA} = 2.42 \times 10^{-5}$  M,  $C_{complex}$  from 0 to  $3.33 \times 10^{-4}$  M) and  $[PdLCl(DMSO)]$  ( $C_{EtBr} = 7.83 \times 10^{-5}$  M,  $C_{RNA} = 2.42 \times 10^{-5}$  M,  $C_{complex}$  from 0 to  $3.32 \times 10^{-4}$  M) Tris-HCl 5 mM, NaCl 100 mM, pH 7.4, 25 °C,  $\lambda_{exc} = 450$  nm,  $\lambda_{em} = 585$  nm.

**Table S5.** Crystal data and structure refinement results for compound [PdLCI(DMSO)].

|                                                                                  |                                                                                  |
|----------------------------------------------------------------------------------|----------------------------------------------------------------------------------|
| <b>Chemical formula</b>                                                          | C <sub>18</sub> H <sub>22</sub> ClN <sub>5</sub> O <sub>3</sub> PdS <sub>2</sub> |
| <b>Formula weight (g mol<sup>-1</sup>)</b>                                       | 562.37                                                                           |
| <b>Temperature (K)</b>                                                           | 296(2)                                                                           |
| <b>Crystal system</b>                                                            | monoclinic                                                                       |
| <b>Wavelength (Å)</b>                                                            | 0.71073                                                                          |
| <b>Space group</b>                                                               | <i>P</i> 1 21/ <i>c</i> 1                                                        |
| <b>Crystal size (mm)</b>                                                         | 0.040 x 0.043 x 0.135                                                            |
| <b><i>a</i> (Å)</b>                                                              | 11.2627(6)                                                                       |
| <b><i>b</i> (Å)</b>                                                              | 26.5445(12)                                                                      |
| <b><i>c</i> (Å)</b>                                                              | 15.8940(7)                                                                       |
| <b><math>\alpha</math> (°)</b>                                                   | 90                                                                               |
| <b><math>\beta</math> (°)</b>                                                    | 109.7256(14)                                                                     |
| <b><math>\gamma</math> (°)</b>                                                   | 90                                                                               |
| <b>Volume (Å<sup>3</sup>)</b>                                                    | 4472.9(4)                                                                        |
| <b><i>Z</i></b>                                                                  | 8                                                                                |
| <b>Density, calculated (g cm<sup>-3</sup>)</b>                                   | 1.670                                                                            |
| <b>Absorption coefficient (mm<sup>-1</sup>)</b>                                  | 1.166                                                                            |
| <b>F(000)</b>                                                                    | 2272                                                                             |
| <b><math>\theta</math> range for data collection (°)</b>                         | 1.53 – 25.35                                                                     |
| <b>Reflections collected</b>                                                     | 70909                                                                            |
| <b>Independent reflections</b>                                                   | 8190 [R(int) = 0.1394]                                                           |
| <b>Coverage of independent collections (%)</b>                                   | 100.0                                                                            |
| <b>Data/restrains/parameters</b>                                                 | 8190 / 0 / 549                                                                   |
| <b>Goodness of fit on F<sup>2</sup></b>                                          | 1.035                                                                            |
| <b>Final R indices [<i>I</i> &gt; 2<math>\sigma</math>(<i>I</i>)] / all data</b> | R1 = 0.0499 / 0.1260<br>wR2 = 0.1084 / 0.1643                                    |
| <b>Largest diff. peak and hole, (e Å<sup>-3</sup>)</b>                           | 0.705 and -0.848                                                                 |
